# Supplementary material for: Biomarkers of cetuximab resistance in patients with head and neck squamous cell carcinoma
Source: PubMed Central journal article supplement (PMC7142836; doi:10.20892/j.issn.2095-3941.2019.0153), 2020-02-15
Supplement: cbm-17-208-s001.pdf [file cbm-17-208-s001.pdf]

## Supplementary materials

**Table S1** Clinical, biological, and pathological characteristics of the 77 HNSCC patients who were treated with cetuximab in the first-line recurrent and/or metastatic setting, and their associations with PFS

| Characteristics      | n (%)      | Progression <sup>c</sup> | HR <sup>d</sup> | 95% CI (HR)  | PFS <sup>e</sup> |
|----------------------|------------|--------------------------|-----------------|--------------|------------------|
| Total                | 77 (100.0) | 72                       |                 |              |                  |
| Age at diagnosis     |            |                          |                 |              |                  |
| < 60 years           | 42 (54.5)  | 40                       | 1               |              | 0.51             |
| ≥ 60 years           | 35 (45.5)  | 32                       | 1.17            | [0.73; 1.87] |                  |
| Gender               |            |                          |                 |              |                  |
| Female               | 18 (23.4)  | 14                       | 1               |              | 0.74             |
| Male                 | 59 (76.6)  | 58                       | 1.11            | [0.61; 2]    |                  |
| Tobacco <sup>a</sup> |            |                          |                 |              |                  |
| No                   | 8 (89.0)   | 6                        | 1               |              | 0.38             |
| Yes                  | 65 (11.0)  | 63                       | 1.45            | [0.63; 3.37] |                  |
| Alcohol <sup>b</sup> |            |                          |                 |              |                  |
| No                   | 24 (43.6)  | 21                       | 1               |              | 0.93             |
| Yes                  | 31 (56.4)  | 31                       | 0.97            | [0.55; 1.72] |                  |
| HPV status           |            |                          |                 |              |                  |
| Negative             | 71 (92.2)  | 66                       | 1               |              | 0.32             |
| Positive             | 6 (7.8)    | 6                        | 1.53            | [0.66; 3.57] |                  |
| AJCC stage           |            |                          |                 |              |                  |
| Stage I–II           | 13 (16.9)  | 11                       | 1               |              | 0.16             |
| Stage III            | 12 (15.6)  | 11                       | 1.57            | [0.68; 3.63] |                  |
| Stage IV             | 52 (67.5)  | 50                       | 1.88            | [0.97; 3.62] |                  |
| Tumor location       |            |                          |                 |              |                  |
| Oral cavity          | 28 (36.4)  | 24                       | 1               |              | 0.47             |
| Oropharynx           | 27 (35.0)  | 27                       | 1.30            | [0.74; 2.26] |                  |
| Larynx               | 10 (13.0)  | 10                       | 1.95            | [0.91; 4.14] |                  |
| Hyopharynx           | 7 (9.1)    | 7                        | 1.30            | [0.56; 3.04] |                  |
| Other                | 5 (6.5)    | 4                        | 1.76            | [0.61; 5.14] |                  |

<sup>a</sup>Information available for 73 patients; <sup>b</sup>information available for 55 patients; <sup>c</sup>progression data collected until June 2016; <sup>d</sup>HR estimated by non-adjusted Cox proportional hazards model; <sup>e</sup>P value of the log-rank test. AJCC; American Joint Committee on Cancer; CI, confidence interval; HR, hazard ratio; HNSCC, head and neck squamous cell carcinoma; HPV; human papillomavirus; PFS, progression-free survival.

**Table S2** Clinical, biological, and pathological characteristics of the 38 HNSCC patients who were treated with cetuximab combined with radiotherapy, and their associations with PFS

| Characteristics      | n (%)      | Progression <sup>c</sup> | HR <sup>d</sup> | 95% CI (HR)   | PFS <sup>e</sup> |
|----------------------|------------|--------------------------|-----------------|---------------|------------------|
| Total                | 38 (100.0) | 25                       |                 |               |                  |
| Age at diagnosis     |            |                          |                 |               |                  |
| < 60 years           | 11 (28.9)  | 7                        | 1               |               | 0.89             |
| ≥ 60 years           | 27 (71.1)  | 18                       | 0.94            | [0.39; 2.25]  |                  |
| Gender               |            |                          |                 |               |                  |
| Female               | 8 (21.1)   | 4                        | 1               |               | 0.13             |
| Male                 | 30 (78.9)  | 21                       | 2.25            | [0.77; 6.58]  |                  |
| Tobacco <sup>a</sup> |            |                          |                 |               |                  |
| No                   | 7 (18.9)   | 2                        | 1               |               | <b>0.03</b>      |
| Yes                  | 30 (81.1)  | 22                       | 4.34            | [1.02; 18.55] |                  |
| Alcohol <sup>b</sup> |            |                          |                 |               |                  |
| No                   | 13 (40.6)  | 7                        | 1               |               | 0.19             |
| Yes                  | 19 (59.4)  | 14                       | 1.82            | [0.73; 4.52]  |                  |
| HPV status           |            |                          |                 |               |                  |
| Negative             | 29 (76.3)  | 22                       | 1               |               | <b>0.01</b>      |
| Positive             | 9 (23.7)   | 3                        | 0.23            | [0.07; 0.78]  |                  |
| AJCC stage           |            |                          |                 |               |                  |
| Stage I–II           | 3 (7.9)    | 3                        | 1               |               | <b>&lt;0.001</b> |
| Stage III            | 12 (31.6)  | 6                        | 0.02            | [0; 0.16]     |                  |
| Stage IV             | 23 (60.5)  | 16                       | 0.04            | [0.01; 0.23]  |                  |
| Tumor location       |            |                          |                 |               |                  |
| Oral cavity          | 5 (13.2)   | 5                        | 1               |               | 0.58             |
| Oropharynx           | 23 (60.5)  | 14                       | 0.53            | [0.19; 1.47]  |                  |
| Larynx               | 5 (13.2)   | 2                        | 0.31            | [0.06; 1.61]  |                  |
| Hypopharynx          | 1 (2.6)    | 1                        | 0.61            | [0.07; 5.25]  |                  |
| Other                | 4 (10.5)   | 3                        | 0.85            | [0.20; 3.57]  |                  |

<sup>a</sup>Information available for 37 patients; <sup>b</sup>information available for 32 patients; <sup>c</sup>progression data collected until June 2016; <sup>d</sup>HR estimated by non-adjusted Cox proportional hazards model; <sup>e</sup>P value of the log-rank test. AJCC; American Joint Committee on Cancer; CI, confidence interval; HR, hazard ratio; HNSCC, head and neck squamous cell carcinoma; HPV; human papillomavirus; PFS, progression-free survival.

**Table S3** Clinical, biological, and pathological characteristics of the HNSCC patients, compared between those treated with cetuximab in the locally advanced setting versus in an R/M setting

| Characteristics      | Cetuximab in first line recurrent and/or metastatic setting (group 1) (%) | RT + cetuximab (group 2) (%) | <i>P</i> <sup>c</sup> |
|----------------------|---------------------------------------------------------------------------|------------------------------|-----------------------|
| Total                | 77 (100.0)                                                                | 38 (100.0)                   |                       |
| Age                  |                                                                           |                              |                       |
| < 60 years           | 42 (54.5)                                                                 | 11 (28.9)                    | <b>0.01</b>           |
| ≥ 60 years           | 35 (45.5)                                                                 | 27 (71.1)                    |                       |
| Gender               |                                                                           |                              |                       |
| Male                 | 59 (76.6)                                                                 | 30 (78.9)                    | 0.78                  |
| Female               | 18 (23.4)                                                                 | 8 (21.1)                     |                       |
| Tobacco <sup>a</sup> |                                                                           |                              |                       |
| Yes                  | 65 (89.0)                                                                 | 30 (81.1)                    | 0.25                  |
| No                   | 8 (11.0)                                                                  | 7 (18.9)                     |                       |
| Alcohol <sup>b</sup> |                                                                           |                              |                       |
| Yes                  | 31 (56.4)                                                                 | 19 (59.4)                    | 0.78                  |
| No                   | 24 (43.6)                                                                 | 13 (40.6)                    |                       |
| HPV status           |                                                                           |                              |                       |
| Positive             | 6 (7.8)                                                                   | 9 (23.7)                     | <b>0.04</b>           |
| Negative             | 71 (92.2)                                                                 | 29 (76.3)                    |                       |
| AJCC stage           |                                                                           |                              |                       |
| Stage I–II           | 13 (16.9)                                                                 | 3 (7.9)                      | 0.09                  |
| Stage III            | 12 (15.6)                                                                 | 12 (31.6)                    |                       |
| Stage IV             | 52 (67.5)                                                                 | 23 (60.5)                    |                       |
| Tumor location       |                                                                           |                              |                       |
| Oral cavity          | 28 (36.4)                                                                 | 5 (13.2)                     | <b>0.03</b>           |
| Oropharynx           | 27 (35.0)                                                                 | 23 (60.5)                    |                       |
| Larynx               | 10 (13)                                                                   | 5 (13.2)                     |                       |
| Hypopharynx          | 7 (9.1)                                                                   | 1 (2.6)                      |                       |
| Other                | 5 (6.5)                                                                   | 4 (10.5)                     |                       |

<sup>a</sup>Information available for 110 patients (73 patients for group 1, 37 for group 2); <sup>b</sup>information available for 87 patients (55 patients for group 1, 32 for group 2); <sup>c</sup>Yates's  $\chi^2$  test. AJCC; American Joint Committee on Cancer; CT, chemotherapy; CI, confidence interval; HR, hazard ratio; HNSCC, head and neck squamous cell carcinoma; HPV; human papillomavirus; PFS, progression-free survival; R/M, recurrent and/or metastatic; RT, radiotherapy.

**Table S4** Mutational profiles of the 115 HNSCC samples

| Gene          | Exon | Mutation status     | Number of mutated samples |
|---------------|------|---------------------|---------------------------|
| <i>PIK3CA</i> | 9    | p.E545K; c.1633G>A  | 5                         |
|               |      | p.E542K; c.1624G>A  | 3                         |
|               | 20   | p.H1047R; c.3140A>G | 4                         |
| <i>KRAS</i>   | 2    | p.G12C; c.34G>T     | 1                         |
|               | 4    | p.A146V; c.437C>T   | 1                         |
| <i>HRAS</i>   | 2    | p.G12D; c.35G>A     | 1                         |
|               |      | p.G12S; c.34G>A     | 1                         |
|               | 3    | p.Q61R; c.182A>G    | 1                         |
|               |      | p.Q61L; c.182A>T    | 1                         |

HNSCC, head abd neck squamous cell carcinoma.

**Table S5** Relationship between global resistance biomarker status and the clinical, biological, and pathological parameters among the 77 HNSCC patients treated with cetuximab in first-line recurrent and/or metastatic setting

| Characteristics      | Tumors with a resistance biomarker (%) | Tumors without a resistance biomarker (%) | <i>P</i> <sup>c</sup> |
|----------------------|----------------------------------------|-------------------------------------------|-----------------------|
| Total                | 14 (18.2)                              | 63 (81.8)                                 |                       |
| Age                  |                                        |                                           |                       |
| < 60 years           | 4 (28.6)                               | 38 (60.3)                                 | <b>0.03</b>           |
| ≥ 60 years           | 10 (71.4)                              | 25 (39.7)                                 |                       |
| Gender               |                                        |                                           |                       |
| Male                 | 11 (78.6)                              | 48 (76.2)                                 | 0.85                  |
| Female               | 3 (21.4)                               | 15 (23.8)                                 |                       |
| Tobacco <sup>a</sup> |                                        |                                           |                       |
| Yes                  | 11 (91.7)                              | 54 (88.5)                                 | 0.75                  |
| No                   | 1 (8.3)                                | 7 (11.5)                                  |                       |
| Alcohol <sup>b</sup> |                                        |                                           |                       |
| Yes                  | 6 (54.5)                               | 25 (56.8)                                 | 0.89                  |
| No                   | 5 (45.5)                               | 19 (43.2)                                 |                       |
| HPV status           |                                        |                                           |                       |
| Positive             | 3 (21.4)                               | 3 (4.8)                                   | 0.12 <sup>c</sup>     |
| Negative             | 11 (78.6)                              | 60 (95.2)                                 |                       |
| AJCC stage           |                                        |                                           |                       |
| Stage I–II           | 1 (7.1)                                | 12 (19.0)                                 | 0.28 <sup>c</sup>     |
| Stage III            | 1 (7.1)                                | 11 (17.5)                                 |                       |
| Stage IV             | 12 (85.7)                              | 40 (63.5)                                 |                       |
| Tumor location       |                                        |                                           |                       |
| Oral cavity          | 4 (28.6)                               | 24 (38.1)                                 | 0.15                  |
| Oropharynx           | 5 (35.7)                               | 22 (34.9)                                 |                       |
| Larynx               | 1 (7.1)                                | 9 (14.3)                                  |                       |
| Hypopharynx          | 1 (7.1)                                | 6 (9.5)                                   |                       |
| Other                | 3 (21.4)                               | 2 (3.2)                                   |                       |

<sup>a</sup>Information available for 73 patients; <sup>b</sup>information available for 55 patients; <sup>c</sup>Yates's  $\chi^2$  test. AJCC; American Joint Committee on Cancer; HNSCC, head and neck squamous cell carcinoma; HPV; human papillomavirus.

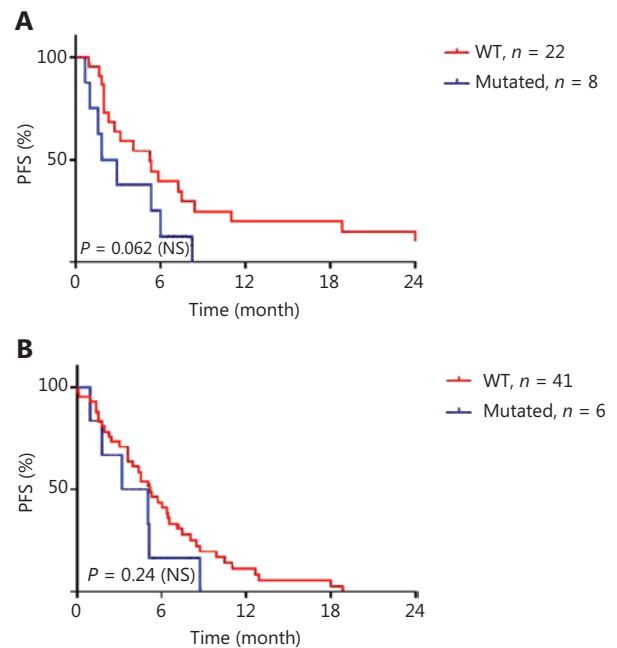

**Figure S1** Progression-free-survival (PFS) in a first-line recurrence and/or metastatic setting, comparing patients with and without a biomarker of resistance (*PIK3CA* mutation, *RAS* mutation, or loss of PTEN protein expression). (A) Patients treated with cetuximab alone. (B) Patients treated with cetuximab + chemotherapy.

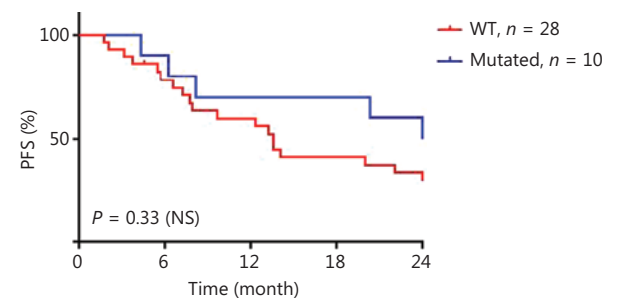

**Figure S2** Progression-free-survival (PFS) in group 2 (cetuximab + radiotherapy), comparing patients with and without a biomarker of resistance (*PIK3CA* mutation, *RAS* mutation, or loss of PTEN protein expression).

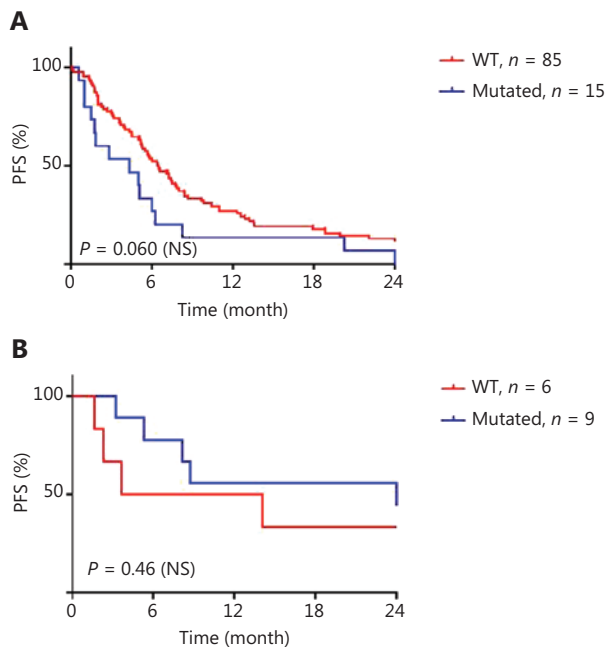

**Figure S3** Progression-free-survival (PFS) in patients with and without a biomarker of resistance (PIK3CA mutation, RAS mutation, or loss of PTEN protein expression). (A) human papillomavirus (HPV) negative patients. (B) HPV positive patients.
